# Supplementary material for: Absorption, distribution, and toxicity of per- and polyfluoroalkyl substances (PFAS) in the brain: a review
Source: Royal Society of Chemistry journal article supplement (doi:10.1039/d1em00228g), 2021-01-01
Supplement: d1em00228g1.xlsx [file d1em00228g1.xlsx]

## Sheet: Table S1
Table S1 All PFAS analyzed in the reviewed papers
Name	Acronym	Carbon Chain Length
perfluorobutanoic acid	PFBA	4
perfluoropentanoic acid	PFPeA	5
perfluorohexanoic acid	PFHxA	6
perfluoroheptanoic acid	PFHpA	7
perfluorooctanoic acid	PFOA	8
perfluorononanoic acid	PFNA	9
perfluorodecanoic acid	PFDA	10
perfluoroundecanoic acid	PFUnDA (PFUDA)	11
perfluorododecanoic acid	PFDoDA (PFDoA)	12
perfluorotridecanoic acid	PFTrDA (PFTriDA)	13
perfluorotetradecanoic acid	PFTeDA (PFTeA, PFTA)	14
perfluoropentadecanoic acid	PFPeDA	15
perfluorohexadecanoic acid	PFHxDA	16
perfluorooctadecanoic acid	PFODA (PFOcDA)	18
perfluorobutane sulfonic acid	PFBS	4
perfluoropentane sulfonate	PFPeS (PFPS)	5
perfluorohexane sulfonic acid	PFHxS	6
perfluoroheptane sulfonate	PFHpS	7
perfluorooctane sulfonic acid	PFOS	8
perfluorononane sulfonate	PFNS	9
perfluorodecane sulfonic acid	PFDS	10
perfluorohexyl ethanoic acid	FHEA	8
perfluorooctyl ethanoic acid	FOEA	10
perfluorodecyl ethanoic acid	FDEA	12
perfluorooctane sulfonamide	PFOSA (FOSA)	8
2H-perfluoro-2-octenoic acid	6:2 FTUCA	8
2H-perfluoro-2-decenoic acid	8:2 FTUCA	10
2H-perfluoro-2-dodecenoic acid	10:2 FTUCA	12
4:2 chlorinated polyfluoroalkyl ether sulfonate	4:2 Cl-PFESA	6
6:2 chlorinated polyfluoroalkyl ether sulfonate	6:2 Cl-PFESA (F-53B)	8
8:2 chlorinated polyfluoroalkyl ether sulfonate	8:2 Cl-PFESA	10
N-methylperfluorooctane sulfonamide	N-MeFOSA	9
N-ethylperfluorooctane sulfonamide	N-EtFOSA	10
N-methyl perfluorooctane sulfonamidoacetic acid	N-MeFOSAA (MeFOSAA)	11
N-ethylperfluorooctane sulfonamidoacetic acid	N-EtFOSAA (EtFOSAA)	12
2-(N-methyl perfluorooctane sulfonamido)-ethanol	N-MeFOSE	8
2-(N-ethylperfluorooctane sulfonamido)-ethanol	N-EtFOSE	9
4:2 fluorotelomer sulfonate	4:2 FTS	6
6:2 fluorotelomer sulfonate	6:2 FTS	8
8:2 fluorotelomer sulfonate	8:2 FTS	10
perfluoro-1-octane sulfinate	PFOSi	6
N-methylperfluorobutane sulfonamidoethanol	MeFBSE	7

## Sheet: Table S2
Table S2 Mean PFAS concentrations in the brains, blood and livers
Organism	Reference		Average PFAS content (ng/g wet weight)
			PFBA	PFPeA	PFHxA	PFHpA	PFOA	PFNA	PFDA	PFUnDA (PFUDA)	PFDoDA (PFDoA)	PFTrDA (PFTriDA)	PFTeDA (PFTeA, PFTA)	PFPeDA	PFHxDA	PFODA (PFOcDA)	PFBS	PFPeS (PFPS)	PFHxS	PFHpS	PFOS	PFNS	PFDS	FHEA	FOEA	FDEA	PFOSA (FOSA)	6:2 FTUCA	8:2 FTUCA	10:2 FTUCA	4:2 Cl-PFESA	6:2 Cl-PFESA (F-53B)	8:2 Cl-PFESA	N-MeFOSA	N-EtFOSA	N-MeFOSAA (MeFOSAA)	N-EtFOSAA (EtFOSAA)	N-MeFOSE	N-EtFOSE	4:2 FTS	6:2 FTS	8:2 FTS	PFOSi	MeFBSE
			BRAIN
Human	Maestri et al., 2006	brain	-	-	-	-	0.5	-	-	-	-	-	-	-	-		-	-	-	-	1.3	-	-	-	-	-	-	-	-	-	-	-	-	-	-	-	-	-	-	-	-	-	-	-
		blood	-	-	-	-	3	-	-	-	-	-	-	-	-		-	-	-	-	5.1	-	-	-	-	-	-	-	-	-	-	-	-	-	-	-	-	-	-	-	-	-	-	-
		Cbrain/Cblood	-	-	-	-	0.166667	-	-	-	-	-	-	-	-		-	-	-	-	0.254902	-	-	-	-	-	-	-	-	-	-	-	-	-	-	-	-	-	-	-	-	-	-	-
		liver	-	-	-	-	3.1	-	-	-	-	-	-	-	-		-	-	-	-	13.6	-	-	-	-	-	-	-	-	-	-	-	-	-	-	-	-	-	-	-	-	-	-	-
		Cbrain/Cliver	-	-	-	-	0.16129	-	-	-	-	-	-	-	-		-	-	-	-	0.0955882	-	-	-	-	-	-	-	-	-	-	-	-	-	-	-	-	-	-	-	-	-	-	-
	Pérez et al., 2013	brain	13.5	<LOD	180	<LOD	<LOD	29.7	23.4	<LOD	13.2	9.9	24.8	-	<LOD	<LOD	<LOD	-	3.2	-	4.9	-	0.3	18.6	<LOD	<LOD	<LOD	-	-	-	-	-	-	-	-	-	-	-	-	-	-	-	-	-
		liver	12.9	1.4	115	33.3	13.6	1.3	<LOD	<LOD	2.4	2.1	<LOD	-	<LOD	2.5	0.9	-	4.6	-	102	-	<LOD	92.6	2.8	3.7	<LOD	-	-	-	-	-	-	-	-	-	-	-	-	-	-	-	-	-
		Cbrain/Cliver	1.04651	-	1.56522	-	-	22.8462	-	-	5.5	4.71429	-	-	-	-	-	-	0.695652	-	0.0480392	-	-	0.200864	-	-	-	-	-	-	-	-	-	-	-	-	-	-	-	-	-	-	-	-
Polar bear	Greaves et al., 2012 & Greaves et al., 2013	brain	-	-	n.d.	n.d.	0.27	1.87	2.12	16	7.21	31.4	7.45	10.4	-	-	-	-	1.37	-	35.2	-	1.3	-	-	-	1.33	n.d.	n.d.	n.d.	-	-	-	-	-	-	-	-	-	-	-	-	-	-
		blood	-	-	n.d.	0.5	3.53	17.8	7.05	21.8	5.16	14.3	2.66	1.35	-	-	-	-	18	-	128	-	1.28	-	-	-	3.5	n.d	n.d	n.d	-	-	-	-	-	-	-	-	-	-	-	-	-	-
		Cbrain/Cblood	-	-	-	-	0.0764873	0.105056	0.300709	0.733945	1.39729	2.1958	2.80075	7.7037	-	-	-	-	0.0761111	-	0.275	-	1.01562	-	-	-	0.38	-	-	-	-	-	-	-	-	-	-	-	-	-	-	-	-	-
		liver	-	-	18.5	8.39	39.2	497	184	276	41.5	82.1	18	0.81	-	-	-	-	30.9	-	3270	-	n.d.	-	-	-	151	0.98	1.13	n.d.	-	-	-	-	-	-	-	-	-	-	-	-	-	-
		Cbrain/Cliver	-	-	-	-	0.00688776	0.00376258	0.0115217	0.057971	0.173735	0.38246	0.413889	12.8395	-	-	-	-	0.0443366	-	0.0107645	-	-	-	-	-	0.00880795	-	-	-	-	-	-	-	-	-	-	-	-	-	-	-	-	-
	Pedersen et al., 2015	brain	-	-	0.13	n.d.	1.09	2.59	2.63	22.3	8.19	37.87	6.81	4.71	-	-	0.55	-	1.1		22.92	-	0.66	-	-	-	-	-	-	-	-	-	-	-	-	-	-	-	-	-	-	-	-	-
Harbor seals	Ahrens et al., 2009	Brain	-	-	-	-	0.06	1.2	1.55	1.06	0.51	0.73	0.1	n.d.	-	-	n.d.	n.d.	1.58	0.66	99	n.d.	0.04	-	-	-	0.14	-	-	-	-	-	-	-	-	-	-	-	-	-	-	-	n.d.	n.d.
		blood	-	-	-	-	0.62	3.93	4.38	1.71	0.47	0.76	0.08	0.04	-	-	4.32	5.9	3.16	0.66	349	0.1	0.12	-	-	-	5.06	-	-	-	-	-	-	-	-	-	-	-	-	-	-	-	0.03	n.d.
		Cbrain/Cblood	-	-	-	-	0.0967742	0.305344	0.353881	0.619883	1.08511	0.960526	1.25	-	-	-	-	-	0.5	1	0.283668	-	0.333333	-	-	-	0.027668	-	-	-	-	-	-	-	-	-	-	-	-	-	-	-	-	-
		liver	-	-	-	-	0.7	15.3	15.2	5.26	1.47	1.53	0.22	n.d.	-	-	0.32	1.75	6.9	2.27	1017	0.74	0.53	-	-	-	1.55	-	-	-	-	-	-	-	-	-	-	-	-	-	-	-	0.05	n.d.
		Cbrain/Cliver	-	-	-	-	0.0857143	0.0784314	0.101974	0.201521	0.346939	0.477124	0.454545	-	-	-	-	-	0.228986	0.290749	0.0973451	-	0.0754717	-	-	-	0.0903226	-	-	-	-	-	-	-	-	-	-	-	-	-	-	-	-	-
Pilot whale	Dassuncao et al., 2019c	brain	1.11	0.1	0.12	0.05	0.19	0.64	1.84	9.2	4.47	33.5	6.65	-	-	-	0.11	0.62	0.06	0.28	6.18	0.07	1.49	-	-	-	6.4	-	-	-	-	-	-	-	-	0.28	0.02	-	-	0.01	0.03	0.01	-	-
		liver	1.11	0.22	3.84	0.12	0.53	18.3	24.1	74.4	10.4	32.6	5.03	-	-	-	0.11	0.62	0.17	0.57	58.1	0.07	0.93	-	-	-	20	-	-	-	-	-	-	-	-	0.28	0.02	-	-	0.01	0.03	0.01	-	-
		Cbrain/Cliver	1	0.454545	0.03125	0.416667	0.358491	0.0349727	0.0763485	0.123656	0.429808	1.02761	1.32207	-	-	-	1	1	0.352941	0.491228	0.106368	1	1.60215	-	-	-	0.32	-	-	-	-	-	-	-	-	1	1	-	-	1	1	1	-	-
Glaucous gulls	Verreault et al, 2005a,b	brain	-	-	0.383	<LOD	<LOD	0.073	<LOD	0.116	-	-	-	-	-	-	<LOD	-	0.043	-	1.338	-	-	-	-	-	<LOD	-	-	-	-	-	-	-	-	-	-	-	-	-	-	-	-	-
		liver	-	-	0.21	<LOD	<LOD	1.53679	<LOD	<LOD	-	-	-	-	-	-	<LOD	-	0.311026	-	51.1555	-	-	-	-	-	<LOD	-	-	-	-	-	-	-	-	-	-	-	-	-	-	-	-	-
		Cbrain/Cliver	-	-	1.82381	-	-	0.0475016	-	-	-	-	-	-	-	-	-	-	0.138252	-	0.0261555	-	-	-	-	-	-	-	-	-	-	-	-	-	-	-	-	-	-	-	-	-	-	-
Pelicans	Olivero-Verbe et al., 2006	brain	-	-	-	-	-	-	-	-	-	-	-	-	-	-	-	-	-	-	3.5	-	-	-	-	-	1.3	-	-	-	-	-	-	-	-	-	-	-	-	-	-	-	-	-
		liver	-	-	-	-	-	-	-	-	-	-	-	-	-	-	-	-	-	-	36.65	-	-	-	-	-	<1	-	-	-	-	-	-	-	-	-	-	-	-	-	-	-	-	-
		Cbrain/Cliver	-	-	-	-	-	-	-	-	-	-	-	-	-	-	-	-	-	-	0.095498	-	-	-	-	-	-	-	-	-	-	-	-	-	-	-	-	-	-	-	-	-	-	-
Red-throated divers	Rubarth et al., 2011	brain	-	-	-	n.d.	0.38	0.8	0.43	5.62	3.17	8.62	2.32	-	<MQL	n.d.	n.d.	-	0.97	0.39	40.36	-	0.53	-	-	-	12.41	-	-	-	-	-	-	n.d.	n.d.	-	-	n.d.	n.d.	-	-	-	-	-
		blood	-	-	-	0.08	0.98	2.03	0.43	3.8	1.12	1.8	0.35	-	n.d.	n.d.	n.d.	-	4.38	0.79	73.14	-	0.23	-	-	-	21.53	-	-	-	-	-	-	n.d.	n.d.	-	-	n.d.	n.d.	-	-	-	-	-
		Cbrain/Cblood	-	-	-	-	0.387755	0.394089	1	1.47895	2.83036	4.78889	6.62857	-	-	-	-	-	0.221461	0.493671	0.551818	-	2.30435	-	-	-	0.576405	-	-	-	-	-	-	-	-	-	-	-	-	-	-	-	-	-
		liver	-	-	-	n.d.	0.97	3.48	0.99	5.46	1.67	3.06	0.79		0.11	n.d.	n.d.	-	2.72	1.71	182.7	-	0.4	-	-	-	18.14	-	-	-	-	-	-	n.d.	n.d.	-	-	n.d.	n.d.	-	-	-	-	-
		Cbrain/Cliver	-	-	-	-	0.391753	0.229885	0.434343	1.0293	1.8982	2.81699	2.93671	-	-	-	-	-	0.356618	0.22807	0.220909	-	1.325	-	-	-	0.684123	-	-	-	-	-	-	-	-	-	-	-	-	-	-	-	-	-
Herring gulls	Gebbink and Letcher., 2012a,e	brain	-	-	-	-	-	-	-	-	-	-	-	-	-	-	-	-	-	-	-	-	-	-	-	-	-	-	-	-	-	-	-	-	-	-	-	-	-	-	-	-	-	-
		plasma	-	-	-	-	-	-	-	-	-	-	-	-	-	-	-	-	-	-	-	-	-	-	-	-	-	-	-	-	-	-	-	-	-	-	-	-	-	-	-	-	-	-
		Cbrain/Cplasma	-	-	-	-	-	-	-	-	-	-	-	-	-	-	-	-	-	-	-	-	-	-	-	-	-	-	-	-	-	-	-	-	-	-	-	-	-	-	-	-	-	-
		liver	-	-	-	-	-	-	-	-	-	-	-	-	-	-	-	-	-	-	-	-	-	-	-	-	-	-	-	-	-	-	-	-	-	-	-	-	-	-	-	-	-	-
		Cbrain/Cliver	-	-	-	-	-	-	-	-	-	-	-	-	-	-	-	-	-	-	-	-	-	-	-	-	-	-	-	-	-	-	-	-	-	-	-	-	-	-	-	-	-	-
Grass carp	Shi et al., 2012	brain	-	-	-	-	0.091	0.091	0.41	0.12	n.d.	n.d.	n.d.	-	-	-	0.022		-		1.56	-	-	-	-	-	0.009	-	-	-	-	-	-	-	-	-	-	-	-	-	-	-	-	-
		blood	-	-	-	n.d.	0.21	0.46	0.74	1.36	0.32	1.04	0.024	-	-	-	0.006		0.012		5.77	-	-	-	-	-	0.33	-	-	-	-	-	-	-	-	-	-	-	-	-	-	-	-	-
		Cbrain/Cblood	-	-	-	-	0.433333	0.197826	0.554054	0.0882353	-	-	-	-	-	-	3.66667	-	-	-	0.270364	-	-	-	-	-	0.0272727	-	-	-	-	-	-	-	-	-	-	-	-	-	-	-	-	-
		liver	-	-	-	n.d.	0.082	0.1	0.16	0.27	0.018	n.d.	-	-	-	-	n.d.		0.15		3.01	-	-	-	-	-	0.005	-	-	-	-	-	-	-	-	-	-	-	-	-	-	-	-	-
		Cbrain/Cliver	-	-	-	-	1.10976	0.91	2.5625	0.444444	-	-	-	-	-	-	-	-	-	-	0.518272	-	-	-	-	-	1.8	-	-	-	-	-	-	-	-	-	-	-	-	-	-	-	-	-
Snakehead	Shi et al., 2012	brain	-	-	-	-	0.23	0.15	0.88	1.24	0.29	1.98	0.061	-	-	-	0.064		-		3.55	-	-	-	-	-	0.19	-	-	-	-	-	-	-	-	-	-	-	-	-	-	-	-	-
		blood	-	-	-	0.029	0.39	0.77	1.47	4.81	1.04	3.02	0.14	-	-	-	0.026		0.065		6.1	-	-	-	-	-	2.55	-	-	-	-	-	-	-	-	-	-	-	-	-	-	-	-	-
		Cbrain/Cblood	-	-	-	-	0.589744	0.194805	0.598639	0.257796	0.278846	0.655629	0.435714	-	-	-	2.46154	-	-	-	0.581967	-	-	-	-	-	0.0745098	-	-	-	-	-	-	-	-	-	-	-	-	-	-	-	-	-
		liver	-	-	-	n.d.	0.43	0.58	0.94	2.2	0.46	1.63	-	-	-	-	0.05	-	0.094	-	6.99	-	-	-	-	-	0.19	-	-	-	-	-	-	-	-	-	-	-	-	-	-	-	-	-
		Cbrain/Cliver	-	-	-	-	0.534884	0.258621	0.93617	0.563636	0.630435	1.21472	-	-	-	-	1.28	-	-	-	0.507868	-	-	-	-	-	1	-	-	-	-	-	-	-	-	-	-	-	-	-	-	-	-	-
Crucian carp	Shi et al., 2012	brain	-	-	-	-	0.028	0.069	0.13	0.14	n.d.	n.d.	n.d.	-	-	-	0.061	-	-	-	1.62	-	-	-	-	-	n.d.	-	-	-	-	-	-	-	-	-	-	-	-	-	-	-	-	-
		blood	-	-	-	0.023	0.62	1.02	0.96	1.52	0.23	0.71	n.d.	-	-	-	0.015	-	0.062	-	6.35	-	-	-	-	-	0.15	-	-	-	-	-	-	-	-	-	-	-	-	-	-	-	-	-
		Cbrain/Cblood	-	-	-	-	0.0451613	0.0676471	0.135417	0.0921053	-	-	-	-	-	-	4.06667	-	-	-	0.255118	-	-	-	-	-	-	-	-	-	-	-	-	-	-	-	-	-	-	-	-	-	-	-
		liver	-	-	-	n.d.	0.18	0.19	0.2	0.27	n.d.	n.d.	-	-	-	-	0.01	-	0.06	-	2.51	-	-	-	-	-	0.027	-	-	-	-	-	-	-	-	-	-	-	-	-	-	-	-	-
		Cbrain/Cliver	-	-	-	-	0.155556	0.363158	0.65	0.518519	-	-	-	-	-	-	6.1	-	-	-	0.645418	-	-	-	-	-	-	-	-	-	-	-	-	-	-	-	-	-	-	-	-	-	-	-
Common carp	Shi et al., 2012	brain	-	-	-	-	0.035	0.068	0.27	0.058	n.d.	n.d.	n.d.	-	-	-	0.043	-	-	-	0.56	-	-	-	-	-	0.012	-	-	-	-	-	-	-	-	-	-	-	-	-	-	-	-	-
		blood	-	-	-	n.d.	0.11	0.2	0.48	0.85	0.2	0.79	0.018	-	-	-	0.002	-	0.01	-	3.36	-	-	-	-	-	0.16	-	-	-	-	-	-	-	-	-	-	-	-	-	-	-	-	-
		Cbrain/Cblood	-	-	-	-	0.318182	0.34	0.5625	0.0682353	-	-	-	-	-	-	21.5	-	-	-	0.166667	-	-	-	-	-	0.075	-	-	-	-	-	-	-	-	-	-	-	-	-	-	-	-	-
		liver	-	-	-	n.d.	n.d.	0.056	0.13	0.19	n.d.	0.11	-	-	-	-	0.028	-	0.053	-	1.94	-	-	-	-	-	0.014	-	-	-	-	-	-	-	-	-	-	-	-	-	-	-	-	-
		Cbrain/Cliver	-	-	-	-	-	1.21429	2.07692	0.305263	-	-	-	-	-	-	1.53571	-	-	-	0.28866	-	-	-	-	-	0.857143	-	-	-	-	-	-	-	-	-	-	-	-	-	-	-	-	-
Tilapia	Shi et al., 2012	brain	-	-	-	-	n.d.	0.03	0.38	0.39	n.d.	n.d.	n.d.	-	-	-	0.042	-	-	-	0.51	-	-	-	-	-	0.11	-	-	-	-	-	-	-	-	-	-	-	-	-	-	-	-	-
		blood	-	-	-	0.019	n.d.	0.081	0.31	1.56	0.35	1.11	n.d.	-	-	-	0.003	-	0.003	-	1.15	-	-	-	-	-	1.52	-	-	-	-	-	-	-	-	-	-	-	-	-	-	-	-	-
		Cbrain/Cblood	-	-	-	-	-	0.37037	1.22581	0.25	-	-	-	-	-	-	14	-	-	-	0.443478	-	-	-	-	-	0.0723684	-	-	-	-	-	-	-	-	-	-	-	-	-	-	-	-	-
		liver	-	-	-	n.d.	0.045	0.027	0.15	0.64	0.46	n.d.	-	-	-	-	0.022	-	0.039	-	1.63	-	-	-	-	-	0.06	-	-	-	-	-	-	-	-	-	-	-	-	-	-	-	-	-
		Cbrain/Cliver	-	-	-	-	-	1.11111	2.53333	0.609375	-	-	-	-	-	-	1.90909	-	-	-	0.312883	-	-	-	-	-	1.83333	-	-	-	-	-	-	-	-	-	-	-	-	-	-	-	-	-
Bighead	Shi et al., 2012	brain	-	-	-	-	0.031	0.046	0.46	0.29	0.042	n.d.	n.d.	-	-	-	0.031	-	-	-	5.5	-	-	-	-	-	0.046	-	-	-	-	-	-	-	-	-	-	-	-	-	-	-	-	-
		blood	-	-	-	n.d.	0.2	0.66	3.21	2.86	0.5	0.71	0.033	-	-	-	0.013	-	0.016	-	22.54	-	-	-	-	-	0.65	-	-	-	-	-	-	-	-	-	-	-	-	-	-	-	-	-
		Cbrain/Cblood	-	-	-	-	0.155	0.069697	0.143302	0.101399	0.084	-	-	-	-	-	2.38462	-	-	-	0.244011	-	-	-	-	-	0.0707692	-	-	-	-	-	-	-	-	-	-	-	-	-	-	-	-	-
		liver	-	-	-	0.028	0.1	0.25	1.03	0.89	0.12	0.085	-	-	-	-	0.022	-	0.11	-	14.14	-	-	-	-	-	0.078	-	-	-	-	-	-	-	-	-	-	-	-	-	-	-	-	-
		Cbrain/Cliver	-	-	-	-	0.31	0.184	0.446602	0.325843	0.35	-	-	-	-	-	1.40909	-	-	-	0.388967	-	-	-	-	-	0.589744	-	-	-	-	-	-	-	-	-	-	-	-	-	-	-	-	-
Crucian carp	Wang et al., 2016	brain	2.28	<LOQ	<LOQ	0.51	1.79	1.72	12.04	15.34	37.85	9.58	33.32	-	-	-	1.26	-	1.01	-	-	-	-	-	-	-	-	-	-	-	-	3.17	-	-	-	-	-	-	-	-	-	-	-	-
		blood	7.51	<LOQ	0.61	0.94	12.13	11.13	59.7	77.84	97.47	23.53	36.24	-	-	-	2.33	-	2.74	-	-	-	-	-	-	-	-	-	-	-	-	12	-	-	-	-	-	-	-	-	-	-	-	-
		Cbrain/Cblood	3.29386	-	-	1.84314	6.77654	6.47093	4.95847	5.07432	2.57517	2.45616	1.08764	-	-	-	0.540773	-	0.368613	-	-	-	-	-	-	-	-	-	-	-	-	0.264167	-	-	-	-	-	-	-	-	-	-	-	-
		liver	1.48	<LOQ	<LOQ	<LOQ	21.17	11.96	74.59	77.57	135.8	10.08	15.25	-	-	-	0.47	-	2.35	-	-	-	-	-	-	-	-	-	-	-	-	10.7	-	-	-	-	-	-	-	-	-	-	-	-
		Cbrain/Cliver	1.54054	-	-	-	0.0845536	0.143813	0.161416	0.197757	0.278719	0.950397	2.18492	-	-	-	2.68085	-	0.429787	-	-	-	-	-	-	-	-	-	-	-	-	0.296262	-	-	-	-	-	-	-	-	-	-	-	-
			CSF
Human	Harada et al., 2007c,d	CSF	-	-	-	-	0.06	-	-	-	-	-	-	-	-	-	-	-	-	-	0.1	-	-	-	-	-	-	-	-	-	-	-	-	-	-	-	-	-	-	-	-	-	-	-
		serum	-	-	-	-	2.539	-	-	-	-	-	-	-	-	-	-	-	-	-	17.965	-	-	-	-	-	-	-	-	-	-	-	-	-	-	-	-	-	-	-	-	-	-	-
		CCSF/Cserum	-	-	-	-	0.0236314	-	-	-	-	-	-	-	-	-	-	-	-	-	0.00556638	-	-	-	-	-	-	-	-	-	-	-	-	-	-	-	-	-	-	-	-	-	-	-
	Wang et al., 2018d	CSF	-	-	-	-	0.077954	0.0139917	0.0119929	0.00799528	0.00499705	0.00499705	-	-	-	-	-	-	0.009	0.003	0.028	-	-	-	-	-	-	-	-	-	-	0.0509699	0.00299823	-	-	-	-	-	-	-	-	-	-	-
		serum	-	-	-	0.0380785	7.26225	1.62371	1.40793	0.89338	0.0624878	0.0800625	0.0400312	-	-	-	0.0185511	-	0.803554	0.0995899	6.6159	-	-	-	-	-	-	-	-	-	0.0107401	6.03593	0.103495	-	-	-	-	-	-	-	-	-	-	-
		CCSF/Cserum	-	-	-	-	0.0107341	0.00861716	0.00851814	0.00894947	0.0799684	0.0624144	-	-	-	-	-	-	0.0112002	0.0301235	0.00423223	-	-	-	-	-	-	-	-	-	-	0.00844442	0.0289697	-	-	-	-	-	-	-	-	-	-	-
			- indicates that the information is not available n.d. indicates that PFAS not detected
			<LOD is below limit of detection <LOQ is below the limits of quantification <MQL is below the method quantification limits
			a. the data are from authors, not published in the original paper
			b. the mean values are calculated based on the raw data in the paper
			c. PFAS concentrations are in median values
			d. the unit is converted from ng/ml to ng/g. The density of CSF and serum is from literature: CSF density = 1.00059 g/mL (Lui et al., 1998), serum density = 1.0242 g/mL (Sniegoski and Moody, 1979).
			e. the data can be requested from Dr. Robert Letcher and/or Dr. Wouter Gebbink.
			References
			Ahrens, L., Siebert, U., & Ebinghaus, R. (2009). Total body burden and tissue distribution of polyfluorinated compounds in harbor seals (Phoca vitulina) from the German Bight. Marine Pollution Bulletin, 58(4), 520-525.
			Dassuncao, C., Pickard, H., Pfohl, M., Tokranov, A. K., Li, M., Mikkelsen, B., ... & Sunderland, E. M. (2019). Phospholipid levels predict the tissue distribution of poly-and perfluoroalkyl substances in a marine mammal. Environmental science & technology letters, 6(3), 119-125.
			Gebbink, W. A., & Letcher, R. J. (2012). Comparative tissue and body compartment accumulation and maternal transfer to eggs of perfluoroalkyl sulfonates and carboxylates in Great Lakes herring gulls. Environmental pollution, 162, 40-47.
			Greaves, A. K., Letcher, R. J., Sonne, C., Dietz, R., & Born, E. W. (2012). Tissue-specific concentrations and patterns of perfluoroalkyl carboxylates and sulfonates in East Greenland polar bears. Environmental science & technology, 46(21), 11575-11583.
			Greaves, A. K., Letcher, R. J., Sonne, C., & Dietz, R. (2013). Brain region distribution and patterns of bioaccumulative perfluoroalkyl carboxylates and sulfonates in East Greenland polar bears (Ursus maritimus). Environmental toxicology and chemistry, 32(3), 713-722.
			Harada, K. H., Hashida, S., Kaneko, T., Takenaka, K., Minata, M., Inoue, K., ... & Koizumi, A. (2007). Biliary excretion and cerebrospinal fluid partition of perfluorooctanoate and perfluorooctane sulfonate in humans. Environmental toxicology and pharmacology, 24(2), 134-139.
			Lui, A. C., Polis, T. Z., & Cicutti, N. J. (1998). Densities of cerebrospinal fluid and spinal anaesthetic solutions in surgical patients at body temperature. Canadian Journal of Anaesthesia, 45(4), 297.
			Maestri, L., Negri, S., Ferrari, M., Ghittori, S., Fabris, F., Danesino, P., & Imbriani, M. (2006). Determination of perfluorooctanoic acid and perfluorooctanesulfonate in human tissues by liquid chromatography/single quadrupole mass spectrometry. Rapid Communications in Mass Spectrometry: An International Journal Devoted to the Rapid Dissemination of Up‐to‐the‐Minute Research in Mass Spectrometr…
			Olivero-Verbel, J., Tao, L., Johnson-Restrepo, B., Guette-Fernández, J., Baldiris-Avila, R., O'byrne-Hoyos, I., & Kannan, K. (2006). Perfluorooctanesulfonate and related fluorochemicals in biological samples from the north coast of Colombia. Environmental Pollution, 142(2), 367-372.
			Pedersen, K. E., Basu, N., Letcher, R., Greaves, A. K., Sonne, C., Dietz, R., & Styrishave, B. (2015). Brain region-specific perfluoroalkylated sulfonate (PFSA) and carboxylic acid (PFCA) accumulation and neurochemical biomarker responses in east Greenland polar bears (Ursus maritimus). Environmental research, 138, 22-31.
			Pérez, F., Nadal, M., Navarro-Ortega, A., Fàbrega, F., Domingo, J. L., Barceló, D., & Farré, M. (2013). Accumulation of perfluoroalkyl substances in human tissues. Environment international, 59, 354-362.
			Rubarth, J., Dreyer, A., Guse, N., Einax, J. W., & Ebinghaus, R. (2011). Perfluorinated compounds in red-throated divers from the German Baltic Sea: new findings from their distribution in 10 different tissues. Environmental Chemistry, 8(4), 419-428.
			Shi, Y., Wang, J., Pan, Y., & Cai, Y. (2012). Tissue distribution of perfluorinated compounds in farmed freshwater fish and human exposure by consumption. Environmental Toxicology and chemistry, 31(4), 717-723.
			Sniegoski, L. T., & Moody, J. R. (1979). Determination of serum and blood densities. Analytical chemistry, 51(9), 1577-1578.
			Verreault, J., Houde, M., Gabrielsen, G. W., Berger, U., Haukås, M., Letcher, R. J., & Muir, D. C. (2005). Perfluorinated alkyl substances in plasma, liver, brain, and eggs of glaucous gulls (Larus hyperboreus) from the Norwegian Arctic. Environmental science & technology, 39(19), 7439-7445.
			Wang, Y., Vestergren, R., Shi, Y., Cao, D., Xu, L., Cai, Y., ... & Wu, F. (2016). Identification, tissue distribution, and bioaccumulation potential of cyclic perfluorinated sulfonic acids isomers in an airport impacted ecosystem. Environmental science & technology, 50(20), 10923-10932.
			Wang, J., Pan, Y., Cui, Q., Yao, B., Wang, J., & Dai, J. (2018). Penetration of PFASs across the blood cerebrospinal fluid barrier and its determinants in humans. Environmental science & technology, 52(22), 13553-13561.
